# Supplementary material
Source: PubMed Central journal article supplement (PMC9655882)
Supplement: NIHMS1846384-supplement-1846384_Sup_Material.pdf [file NIHMS1846384-supplement-1846384_Sup_Material.pdf]

Supplementary Materials

NSMB-A20845C

Title: Aminoacylation of tRNA with phosphoserine for synthesis of cysteinyl-tRNA<sup>Cys</sup>

Authors: Chun-Mei Zhang, Cuiping Liu, Simon Slater, and Ya-Ming Hou

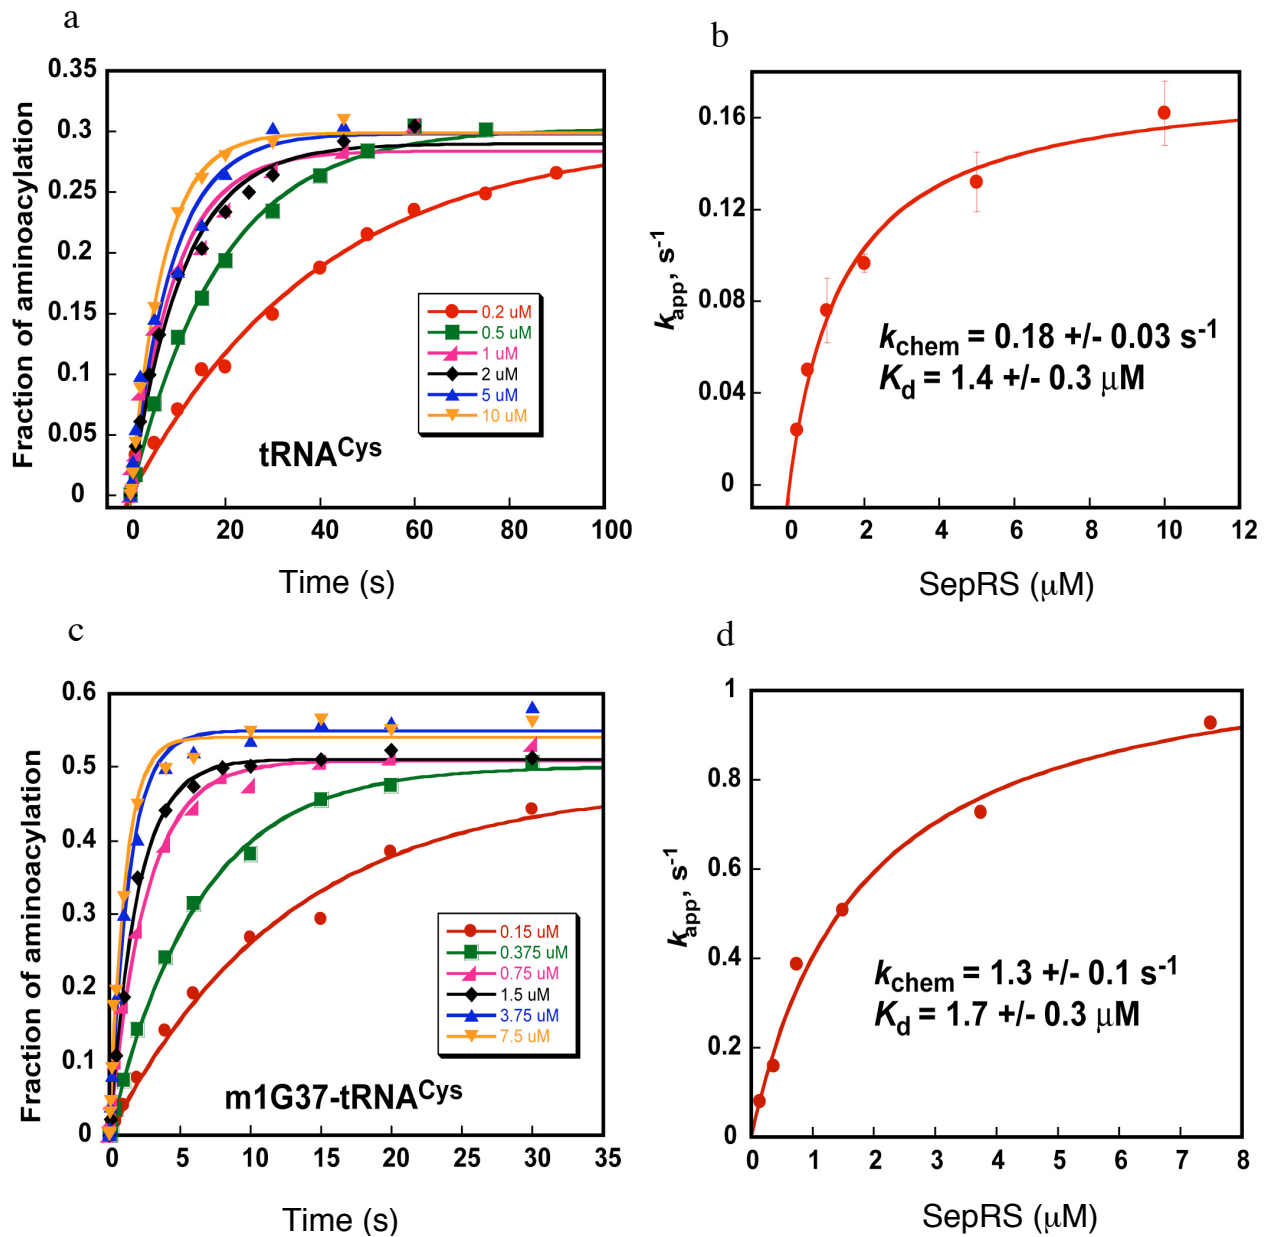

Figure 1 Single turnover kinetics of aminoacylation of *M. jannaschii*  $tRNA^{Cys}$  by *M. jannaschii* SepRS. (A) Time courses of aminoacylation of unmodified transcript by SepRS (0.2 to 10  $\mu M$ ). (B) Replot of  $k_{app}$  vs SepRS concentrations to a hyperbolic equation. (C) Time courses of aminoacylation of m1G37-transcript by SepRS (0.15 to 7.5  $\mu M$ ). (D) Replot of  $k_{app}$  vs SepRS concentrations to a hyperbolic equation. The derived  $k_{chem}$  and  $K_d$  were the average of 2 determinations. The  $\pm$  term refers to standard deviations.

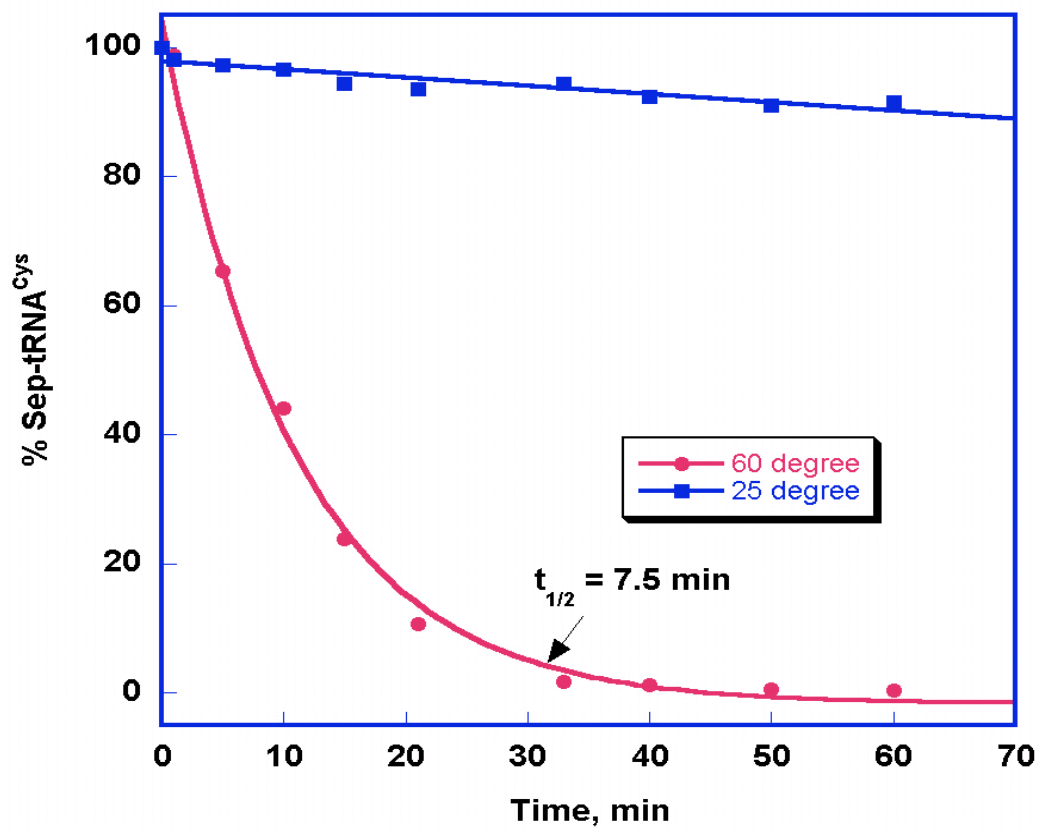

Figure 2 Stability of *M. jannaschii* Sep-tRNA<sup>Cys</sup> measured at 60 °C (red) and at 25 °C (blue). The tRNA transcript was labeled with  $\alpha$ -<sup>32</sup>P-A76 (5  $\mu$ M) and was aminoacylated with Sep by SepRS. After phenol extraction and ethanol precipitation, Sep-tRNA<sup>Cys</sup> was resuspended in 1 x aminoacylation buffer (30 mM NaAc, pH 6.0, 20 mM KCl, 10 mM MgCl<sub>2</sub>, and 5 mM DTT) and incubated at the specified temperatures. At specific time points, an aliquot was removed and digested with P1 nuclease. Deacylation of Sep-tRNA<sup>Cys</sup> was monitored by PEI cellulose plates.

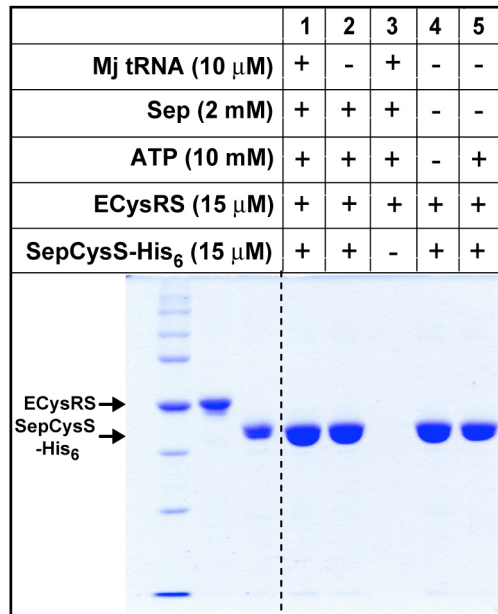

Figure 3 Lack of pull-down of *E. coli* CysRS by *M. jannaschii* SepCysS analyzed by SDS-PAGE.

Table 1. Steady-state kinetics

| tRNA      | <i>M.j</i> SepRS vs. <i>M.j</i> tRNA <sup>Cys(a)</sup> |                                         |                                                          |          | <i>E.coli</i> CysRS vs. <i>E.coli</i> tRNA <sup>Cys</sup>   |                    |
|-----------|--------------------------------------------------------|-----------------------------------------|----------------------------------------------------------|----------|-------------------------------------------------------------|--------------------|
|           | $K_m$<br>( $\mu\text{M}$ )                             | $k_{\text{cat}}$<br>( $\text{s}^{-1}$ ) | $k_{\text{cat}}/K_m$ ( $\mu\text{M}^{-1}\text{s}^{-1}$ ) | relative | $k_{\text{cat}}/K_m$<br>( $\mu\text{M}^{-1}\text{s}^{-1}$ ) | relative           |
| WT        | $0.97 \pm 0.01$                                        | $0.24 \pm 0.04$                         | $0.25 \pm 0.04$                                          | 1        | $0.99 \pm 0.06^{(b)}$                                       | 1                  |
| U73G      | $1.3 \pm 0.3$                                          | $0.01 \pm 0.001$                        | $0.008 \pm 0.002$                                        | 0.03     | $(7 \pm 0.1) \times 10^{-6}^{(b)}$                          | $7 \times 10^{-6}$ |
| G34C      | $19 \pm 5$                                             | $0.08 \pm 0.01$                         | $0.004 \pm 0.001$                                        | 0.02     | $(6 \pm 0.3) \times 10^{-4}^{(b)}$                          | $6 \times 10^{-4}$ |
| C35U      | $7.0 \pm 0.4$                                          | $0.10 \pm 0.02$                         | $0.014 \pm 0.002$                                        | 0.06     | $(3 \pm 0.1) \times 10^{-3}$                                | $3 \times 10^{-3}$ |
| A36G      | $22 \pm 2$                                             | $0.17 \pm 0.01$                         | $0.008 \pm 0.001$                                        | 0.03     | $(2 \pm 0.2) \times 10^{-3}$                                | $2 \times 10^{-3}$ |
| G37A      | $11.4 \pm 0.7$                                         | $0.11 \pm 0.01$                         | $0.01 \pm 0.001$                                         | 0.04     | Not determined                                              |                    |
| A38G      | $2.9 \pm 0.2$                                          | $0.04 \pm 0.01$                         | $0.014 \pm 0.004$                                        | 0.06     | Not determined                                              |                    |
| G15C-C48G | $3.7 \pm 0.8$                                          | $0.17 \pm 0.03$                         | $0.05 \pm 0.01$                                          | 0.2      | $0.02 \pm 0.02$                                             | 0.02               |

(a) Transcripts of m1G37-*M.j* tRNA<sup>Cys</sup> were used except G37A.

(b) Data from Liu *et al.* (2007).
